# Supplementary material for: Incidence and Risk Factors for Severe Pneumonia in Children Hospitalized with Pneumonia in Ujjain, India
Source: PubMed Central journal article supplement (PMC7369688; doi:10.3390/ijerph17134637), 2020-06-27
Supplement: ijerph-17-04637-s001.pdf [file ijerph-17-04637-s001.pdf]

**Table S1.** Definitions used in the study.

| <b>Term</b>                     | <b>Definition</b>                                                                                                                                                                                                           | <b>Reference</b> |
|---------------------------------|-----------------------------------------------------------------------------------------------------------------------------------------------------------------------------------------------------------------------------|------------------|
| Nuclear Family                  | A family that consisted of a married couple and their children occupying the same dwelling space                                                                                                                            | [22]             |
| Joint Family                    | A joint family consisted of more than one married couple and their children who lived together in the same household and shared a common kitchen                                                                            | [22]             |
| Overcrowding                    | Overcrowding was considered to be present if two persons, above 9 years of age, of opposite sexes, not husband and wife, had to sleep in the same room                                                                      | [22]             |
| A Pucca House                   | A pucca house is one, which has walls and roof made of burnt bricks/stones packed with lime or cement                                                                                                                       | [23]             |
| A Kutcha House                  | A kutcha house was one with the walls and/or roof made of material such as un-burnt bricks, bamboos, mud, grass, reeds, thatch, loosely packed stones, etc.                                                                 | [23]             |
| Exclusive Breast-Feeding        | Breast-feeding was considered exclusive if the infant has received only breast milk from his/her mother or a wet nurse, or expressed breast milk, and no other liquids or solids                                            | [24]             |
| Severe Acute Malnutrition (SAM) | SAM was assessed in children between the ages of 6 month to 5 years according to Indian Academy of Pediatrics consensus statement for diagnosis and management of SAM                                                       | [25]             |
| Complicated Pneumonia           | Was defined as an infection involving the lung parenchyma, which was complicated by one or more of the following: parapneumonic effusion, empyema, necrotizing pneumonia, abscess, pneumothorax, and bronchopleural fistula | [26]             |
